# Supplementary material for: A family of [MnIII6LnIII2] rod-like clusters
Source: Royal Society of Chemistry journal article supplement (doi:10.1039/c5dt00300h), 2015-01-01
Supplement: c5dt00300h1.pdf [file c5dt00300h1.pdf]

**Table S1.** Crystallographic data for complexes **3** and **4**.

|                                                | <b>3</b> 6MeCN·0.5H <sub>2</sub> O                                                                  | <b>4</b> 6MeCN·0.5H <sub>2</sub> O                                                                  |
|------------------------------------------------|-----------------------------------------------------------------------------------------------------|-----------------------------------------------------------------------------------------------------|
| Formula                                        | C <sub>102</sub> H <sub>115</sub> Dy <sub>2</sub> Mn <sub>6</sub> N <sub>18</sub> O <sub>42.5</sub> | C <sub>102</sub> H <sub>115</sub> Er <sub>2</sub> Mn <sub>6</sub> N <sub>18</sub> O <sub>42.5</sub> |
| <i>M</i> <sub>w</sub>                          | 2927.75                                                                                             | 2937.27                                                                                             |
| Crystal System                                 | Triclinic                                                                                           | Triclinic                                                                                           |
| Space group                                    | P-1                                                                                                 | P-1                                                                                                 |
| <i>a</i> /Å                                    | 13.533(3)                                                                                           | 13.514(4)                                                                                           |
| <i>b</i> /Å                                    | 14.266(3)                                                                                           | 14.234(5)                                                                                           |
| <i>c</i> /Å                                    | 16.867(4)                                                                                           | 16.827(5)                                                                                           |
| <i>α</i> /°                                    | 91.18(2)                                                                                            | 90.99(3)                                                                                            |
| <i>β</i> /°                                    | 108.18(2)                                                                                           | 108.18(3)                                                                                           |
| <i>γ</i> /°                                    | 111.57(2)                                                                                           | 111.68(4)                                                                                           |
| <i>V</i> /Å <sup>3</sup>                       | 2843.2(12)                                                                                          | 2825.3(18)                                                                                          |
| <i>Z</i>                                       | 1                                                                                                   | 1                                                                                                   |
| <i>T</i> /K                                    | 100                                                                                                 | 100                                                                                                 |
| <i>λ</i> /Å                                    | 0.71073                                                                                             | 0.71073                                                                                             |
| <i>D</i> <sub>c</sub> /g cm <sup>-3</sup>      | 1.710                                                                                               | 1.726                                                                                               |
| <i>μ</i> (Mo-Kα)/mm <sup>-1</sup>              | 2.04                                                                                                | 2.21                                                                                                |
| Meas./indep. ( <i>R</i> <sub>int</sub> ) refl. | 30039 / 15646 (0.036)                                                                               | 35579 / 13963 (0.109)                                                                               |
| Obs. refl. [ <i>I</i> > 2σ( <i>I</i> )]        | 12214                                                                                               | 7765                                                                                                |
| <i>wR</i> <sup>2</sup>                         | 0.110                                                                                               | 0.097                                                                                               |
| <i>R</i> <sup>1</sup>                          | 0.046                                                                                               | 0.058                                                                                               |
| Goodness of fit on <i>F</i> <sup>2</sup>       | 1.04                                                                                                | 1.01                                                                                                |
| Δρ <sub>max,min</sub> /eÅ <sup>-3</sup>        | 2.26, -1.12                                                                                         | 1.21, -0.86                                                                                         |

**Table S2.** Selected bond distances (Å) and angles (°) for **3**.

|                          |            |                       |            |
|--------------------------|------------|-----------------------|------------|
| Dy—O14A                  | 2.277(3)   | Mn2—O1B               | 1.889(3)   |
| Dy—O15C                  | 2.315(3)   | Mn2—O14B              | 1.890(3)   |
| Dy—O14B                  | 2.390(2)   | Mn2—O1                | 1.906(3)   |
| Dy—O2                    | 2.395(2)   | Mn2—N1B               | 1.974(3)   |
| Dy—O21                   | 2.428(3)   | Mn2—O1C               | 2.244(3)   |
| Dy—O12                   | 2.510(3)   | Mn2—O13               | 2.436(3)   |
| Dy—O1                    | 2.519(3)   | Mn3—O14C <sup>i</sup> | 1.882(3)   |
| Dy—O11                   | 2.535(3)   | Mn3—O15C <sup>i</sup> | 1.902(3)   |
| Dy—O22                   | 2.547(3)   | Mn3—O1                | 1.917(2)   |
| Dy—N1                    | 2.909(4)   | Mn3—O2 <sup>i</sup>   | 1.959(2)   |
| Dy—Mn3 <sup>i</sup>      | 3.4141(11) | Mn3—O1W               | 2.248(3)   |
| Dy—Mn2                   | 3.530(9)   | Mn3—O2                | 2.336(3)   |
| Mn1—O1A                  | 1.873(3)   | Mn1—O14C <sup>i</sup> | 2.162(2)   |
| Mn1—O14A                 | 1.874(3)   | Mn1—O13               | 2.198(3)   |
| Mn1—N1A                  | 1.982(3)   | Mn1—Mn3               | 3.1187(11) |
| Mn1—O1                   | 2.104(2)   |                       |            |
|                          |            |                       |            |
| Mn1—Mn3—Dy <sup>i</sup>  | 174.95(2)  | O14A—Dy—O15C          | 154.68(9)  |
| Dy <sup>i</sup> —Mn3—Dy  | 122.43(3)  | O14A—Dy—O14B          | 96.96(9)   |
| Mn2—O1—Mn3               | 133.90(14) | O15C—Dy—O14B          | 77.09(8)   |
| Mn2—O1—Mn1               | 109.81(11) | O14A—Dy—O2            | 98.00(9)   |
| Mn3—O1—Mn1               | 101.63(11) | O15C—Dy—O2            | 65.98(9)   |
| Mn2—O1—Dy                | 101.70(11) | O14B—Dy—O2            | 121.07(9)  |
| Mn3—O1—Dy                | 106.46(10) | O14A—Dy—O21           | 73.97(10)  |
| Mn1—O1—Dy                | 97.94(10)  | O15C—Dy—O21           | 129.41(10) |
| Mn3 <sup>i</sup> —O2—Mn3 | 102.88(11) | O14B—Dy—O21           | 87.30(9)   |
| Mn3 <sup>i</sup> —O2—Dy  | 102.82(11) | O2—Dy—O21             | 151.50(9)  |
| Mn3—O2—Dy                | 98.03(9)   | O14A—Dy—O12           | 118.32(9)  |
| O14A—Dy—O1               | 65.74(9)   | O15C—Dy—O12           | 78.69(9)   |
| O15C—Dy—O1               | 89.88(10)  | O14B—Dy—O12           | 138.54(9)  |
| O14B—Dy—O1               | 64.27(8)   | O2—Dy—O12             | 77.22(9)   |
| O2—Dy—O1                 | 71.21(8)   | O21—Dy—O12            | 82.71(9)   |

Symmetry codes: (i) -x+1, -y+1, -z+1.

**Table S3.** Selected bond distances (Å) and angles (°) for **4**.

|                          |            |                       |            |
|--------------------------|------------|-----------------------|------------|
| Er—O14A                  | 2.266(4)   | Mn2—O14B              | 1.893(4)   |
| Er—O15C                  | 2.307(4)   | Mn2—O1                | 1.901(4)   |
| Er—O14B                  | 2.353(4)   | Mn2—O1B               | 1.909(4)   |
| Er—O2                    | 2.383(4)   | Mn2—N1B               | 1.970(5)   |
| Er—O21                   | 2.408(4)   | Mn2—O1C               | 2.243(4)   |
| Er—O1                    | 2.468(4)   | Mn2—O13               | 2.435(4)   |
| Er—O12                   | 2.470(4)   | Mn3—O14C <sup>i</sup> | 1.889(4)   |
| Er—O11                   | 2.510(4)   | Mn3—O15C <sup>i</sup> | 1.912(4)   |
| Er—O22                   | 2.518(4)   | Mn3—O1                | 1.929(4)   |
| Er—N1                    | 2.878(6)   | Mn3—O2 <sup>i</sup>   | 1.952(4)   |
| Er—Mn3 <sup>i</sup>      | 3.3933(16) | Mn3—O1W               | 2.241(4)   |
| Er—Mn2                   | 3.4228(15) | Mn3—O2                | 2.331(4)   |
| Mn1—O14A                 | 1.868(4)   | Mn1—O14C <sup>i</sup> | 2.153(4)   |
| Mn1—O1A                  | 1.876(4)   | Mn1—O13               | 2.193(4)   |
| Mn1—N1A                  | 1.984(5)   | Mn1—Mn3               | 3.1212(17) |
| Mn1—O1                   | 2.108(4)   |                       |            |
|                          |            |                       |            |
| Mn1—Mn3—Er <sup>i</sup>  | 175.25(4)  | O14A—Er—O15C          | 154.99(14) |
| Er <sup>i</sup> —Mn3—Er  | 122.33(4)  | O14A—Er—O14B          | 97.21(14)  |
| Mn2—O1—Mn3               | 132.8(2)   | O15C—Er—O14B          | 76.84(13)  |
| Mn2—O1—Mn1               | 109.55(16) | O14A—Er—O2            | 97.85(13)  |
| Mn3—O1—Mn1               | 101.22(16) | O15C—Er—O2            | 66.72(13)  |
| Mn2—O1—Er                | 102.36(16) | O14B—Er—O2            | 122.02(14) |
| Mn3—O1—Er                | 107.44(16) | O14A—Er—O21           | 74.03(15)  |
| Mn1—O1—Er                | 98.73(15)  | O15C—Er—O21           | 129.01(14) |
| Mn3 <sup>i</sup> —O2—Mn3 | 102.81(17) | O14B—Er—O21           | 87.21(15)  |
| Mn3 <sup>i</sup> —O2—Er  | 102.57(15) | O2—Er—O21             | 150.67(14) |
| Mn3—O2—Er                | 98.03(13)  | O14A—Er—O1            | 66.04(14)  |
| O15C—Er—O1               | 89.81(14)  | O14B—Er—O1            | 64.75(13)  |
|                          |            |                       |            |

Symmetry code: (i)  $-x+1, -y+1, -z+1$ .

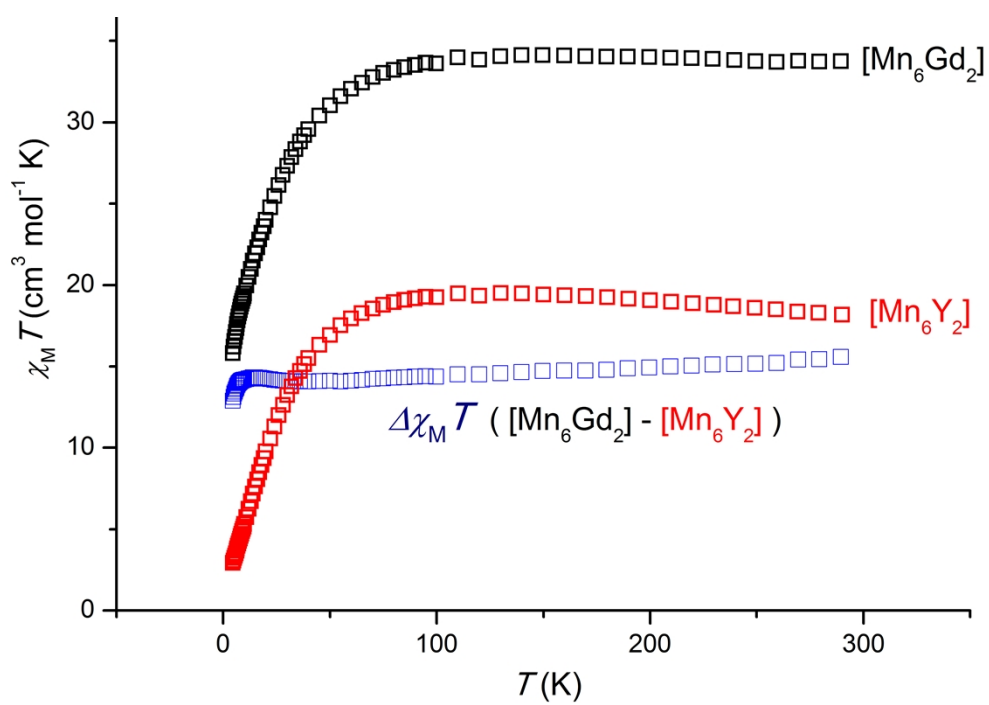

**Figure S1.** Plot of  $\chi_M T$  vs.  $T$  and  $\Delta\chi_M T$  vs.  $T$  for complexes **1** and **5**.
